# Supplementary material
Source: publisher figshare collection journal article supplement (https://acs.figshare.com/ndownloader/files/20156822)
Supplement: Supplementary file 1 [file 20156822]

# Supporting Information

## Surface-Modified Filter-Based Continuous Recovery of Microalgal Lipid-in-Solvent with High Recovery Efficiency, Long-Term Stability, and Cost Competitiveness

Donghyo Lee,<sup>†,§</sup> Hogi Kim,<sup>†,§</sup> Mingyu Jeon,<sup>†</sup> Yong Keun Chang,<sup>\*,†,‡</sup> and Sung Gap Im<sup>\*,†</sup>

<sup>†</sup> *Department of Chemical and Biomolecular Engineering, KAIST, 291 Daehak-ro, Yuseong-gu, Daejeon 34141, Republic of Korea*

<sup>‡</sup> *Advanced Biomass R&D Center, KAIST, #2502 Building W1-3, 291 Daehak-ro, Yuseong-gu, Daejeon 34141, Republic of Korea*

<sup>§</sup> D.L. and H.K. contributed equally

<sup>\*</sup> E-mail: changyk@kaist.ac.kr. Tel: +82-42-350-3927. Fax: +82-42-350-3910 (Y.K.C.).

<sup>\*</sup> E-mail: sgim@kaist.ac.kr. Tel: +82-42-350-3936. Fax: +82-42-350-3910 (S.G. I.).

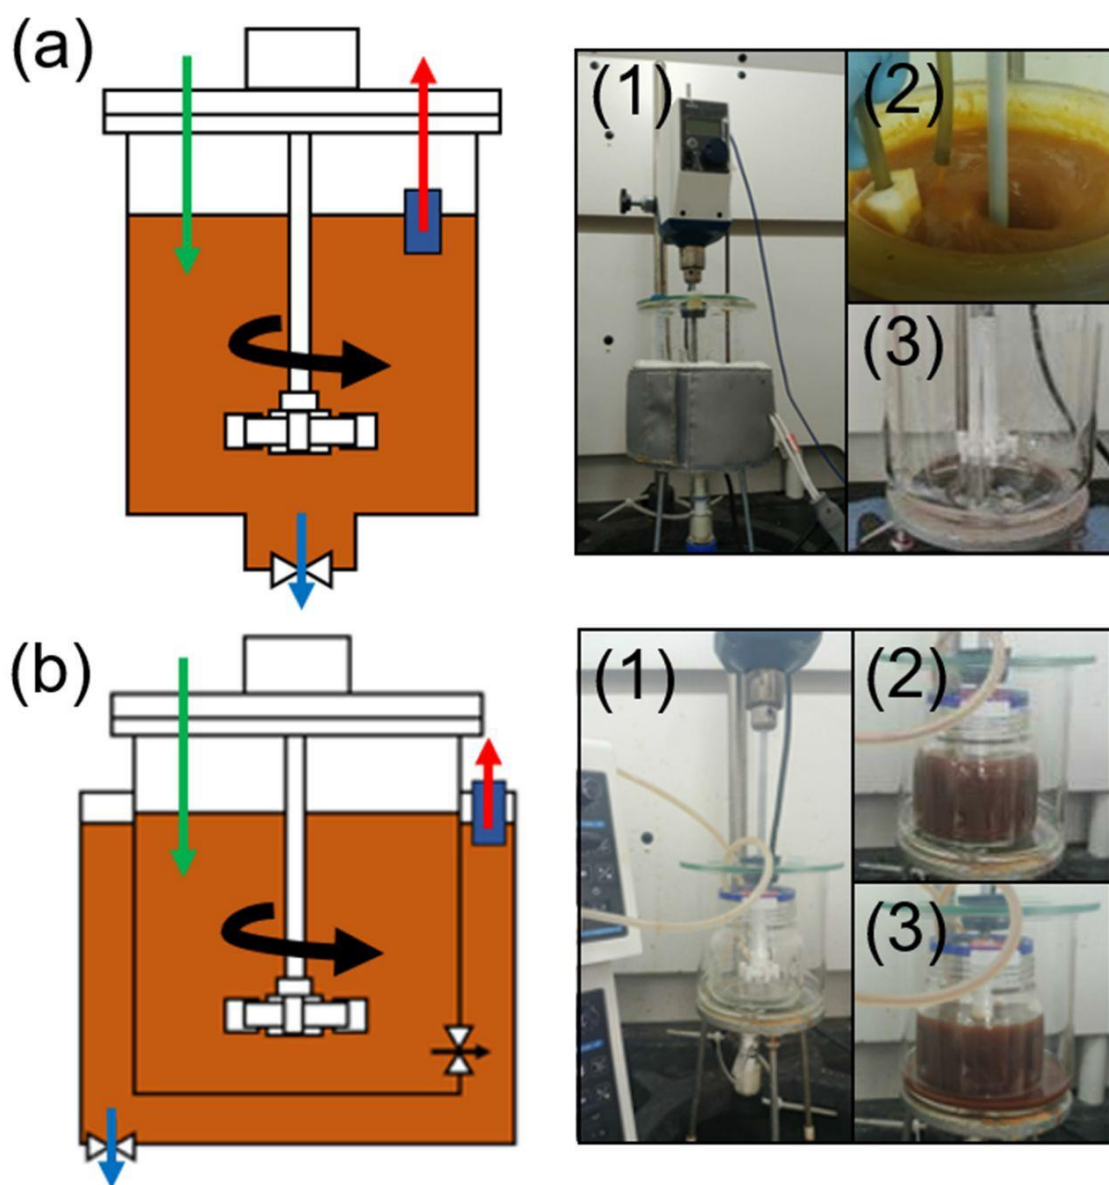

**Figure S1.** Diagrams and images of the experimental apparatus used for lipid extraction and recovery system of (a) *in situ* filtering method: (1) equipment exterior, (2) *in situ* recovery and (3) inner mixer, and (b) *ex situ* filtering Method: (1) equipment exterior, (2) mixture during lipid extraction and (3) the extraction mixture pooled out to the outer vessel.

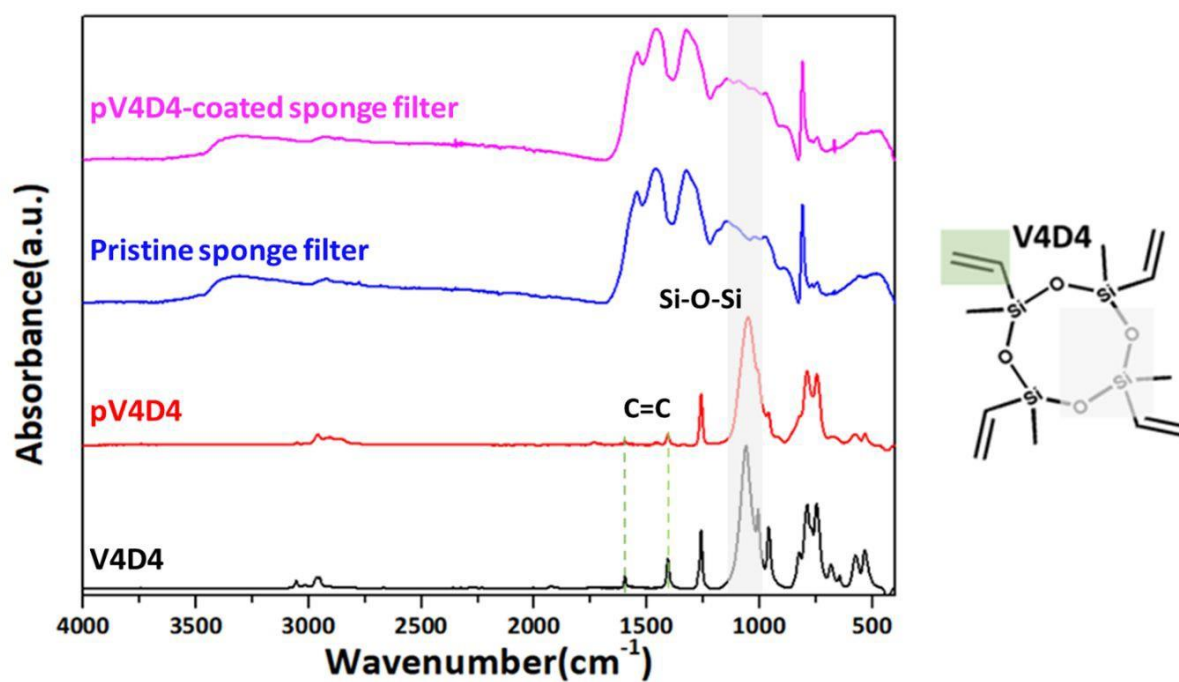

**Figure S2.** FT-IR spectra of V4D4, pV4D4, pristine sponge filter, and pV4D4-coated sponge filter. The green dashed line at 1650  $\text{cm}^{-1}$  represents C=C vinyl bond and the gray area represents characteristic cyclic Si-O-Si bond in V4D4 monomer.

**Table S1.** Porosimeter data of pV4D4 sponge filter (0.20 to 61000.00 psia)

|                                                                       |                         |
|-----------------------------------------------------------------------|-------------------------|
| Total pore area at 32,995.86 psia:                                    | 4.365 m <sup>2</sup> /g |
| Median pore diameter (volume) at 1.35 psia and 69.263 mL/g:           | 133.67986 μm            |
| Median pore diameter (area) at 2.24 psia and 2.182 m <sup>2</sup> /g: | 80.62778 μm             |
| Average pore diameter (4V/A):                                         | 126.95504 μm            |
| Bulk density at 0.23 psia:                                            | 0.0065 g/mL             |
| Apparent (skeletal) density at 32,995.86 psia:                        | 0.0669 g/mL             |
| Porosity                                                              | 90.2610 %               |

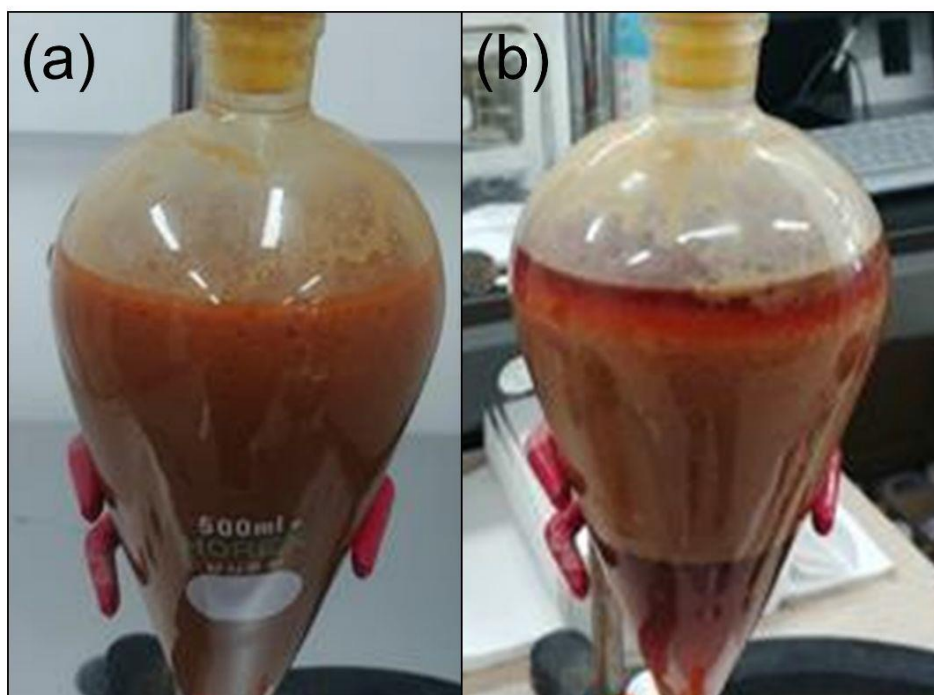

**Figure S3.** Images of extraction mixture during the gravity settling recovery (a) after extraction and (b) after 48 h of settling.

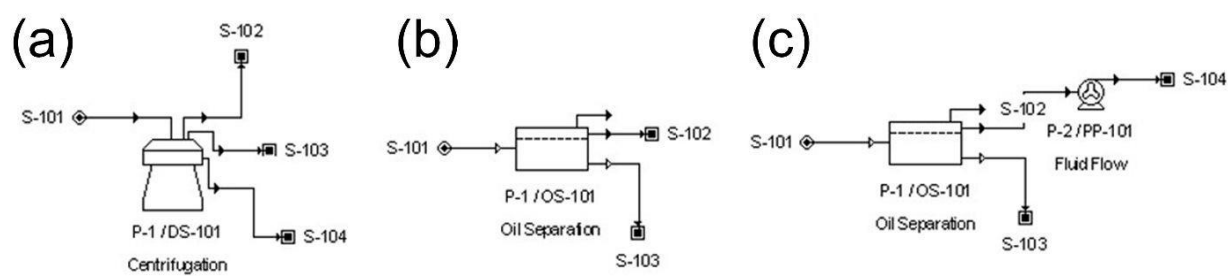

**Figure S4.** Diagrams of unit operations in Superpro designer program chosen as basis for cost analysis (a) disk-stack centrifugation (b) gravity settling (c) this study.

**Table S2.** List of items included in the total capital cost estimation

| Item                                  | Value                          |
|---------------------------------------|--------------------------------|
| <b>Direct cost (DC)</b>               |                                |
| Equipment purchase cost (EPC)         | Estimation from Super designer |
| Installation                          | Estimation from Super designer |
| Piping                                | $0.31 \times \text{EPC}$       |
| Instrumentation                       | $0.43 \times \text{EPC}$       |
| Electrical                            | $0.10 \times \text{EPC}$       |
| Buildings                             | $0.15 \times \text{EPC}$       |
| Yard improvement                      | $0.12 \times \text{EPC}$       |
| Service facilities                    | $0.55 \times \text{EPC}$       |
| <b>Indirect cost (IC)</b>             |                                |
| Engineering                           | $0.34 \times \text{EPC}$       |
| Construction                          | $0.04 \times \text{EPC}$       |
| Contractor's fee                      | $0.19 \times \text{EPC}$       |
| Contingency                           | $0.37 \times \text{EPC}$       |
| <b>Fixed capital investment (FCI)</b> | DC+IC                          |
| <b>Working capital</b>                | $0.15 \times \text{FCI}$       |

**Table S3.** List of items included in the annual operating cost estimation\*

| Item                            | Value                               |
|---------------------------------|-------------------------------------|
| <b>Utility</b>                  |                                     |
| Standard electricity power      | 0.1 \$/Kw-h                         |
| <b>Facility-Dependent Cost*</b> |                                     |
| Maintenance                     | $0.06 \times \text{ECI}$            |
| Miscellaneous                   | $0.08 \times \text{FCI}$            |
| <b>Labor cost**</b>             | $1.82 \times 10^4 \text{ DC}^{0.2}$ |
| <b>Maintenance cost</b>         | $0.1 \times \text{EPC}$             |

\* Material costs and depreciation were excluded

\*\* [reference 34]

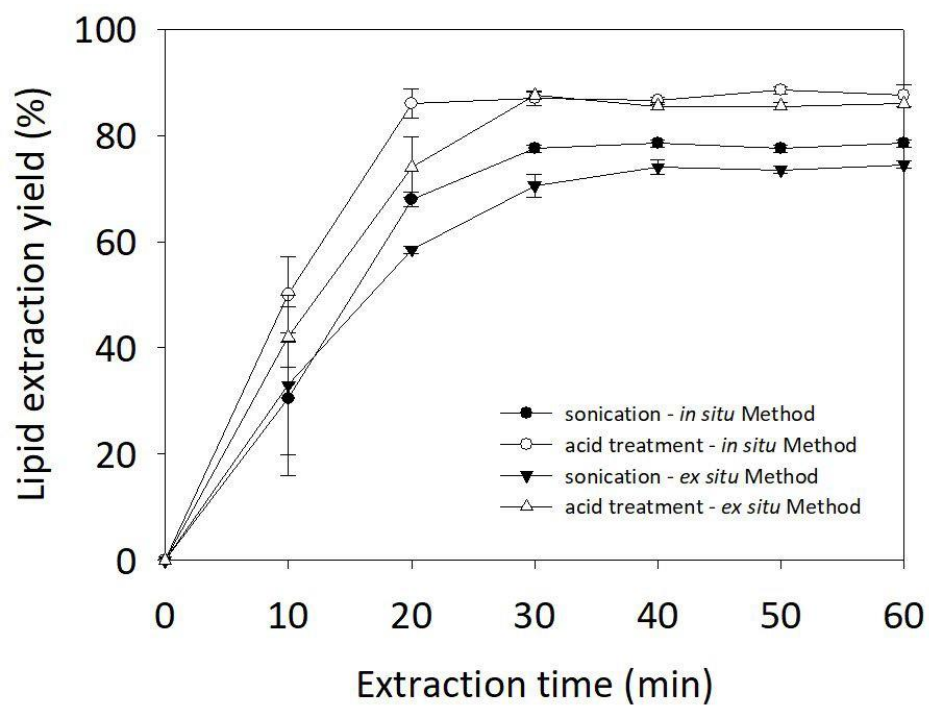

**Figure S5.** Lipid extraction yields according to cell disruption – extraction methods at 500 rpm of stirring speed and 50°C of extraction temperature



**Table S4.** Fatty acid composition of extracted lipid\*

|                                             | <b>Sonication</b> | <b>Acid-treatment</b> |
|---------------------------------------------|-------------------|-----------------------|
| Total lipid (wt%)                           | 42.2 ± 1.3        | 47.9 ± 0.8            |
| Esterifiable lipid                          | 38.6 ± 1.2        | 40.3 ± 0.9            |
| Myristic acid (C14:0)                       | 0.8 ± 0.0         | 1.0 ± 0.0             |
| Palmitic acid (C16:0)                       | 15.2 ± 0.8        | 17.5 ± 0.6            |
| Stearic acid (C18:0)                        | 0.2 ± 0.0         | 0.4 ± 0.0             |
| EPA (C20:5,3)                               | 0.4 ± 0.0         | 0.5 ± 0.0             |
| DPA (C22:5n3)                               | 3.9 ± 0.2         | 4.1 ± 0.4             |
| DHA (C22:6n3)                               | 13.9 ± 1.5        | 14.5 ± 1.8            |
| Other Fatty acid and Non-esterifiable lipid | 7.8 ± 3.1         | 9.9 ± 2.3             |

\* Samples of both *in situ* and *ex situ* Method were taken after 60 minutes of extraction

**Table S5.** Performance comparison of three recovery methods for lipid-in-solvent

|                                                            | Centrifugation    | Gravity settling  | This study        |
|------------------------------------------------------------|-------------------|-------------------|-------------------|
| <b>1. Recovery Yield (%)</b>                               | 95*               | 26*               | 95                |
| <b>2. Recovery rate (ml/min) *</b>                         | 50*               | 0.70*             | 31                |
| - EPC (\$) **                                              | $2.9 \times 10^5$ | $1.1 \times 10^4$ | $1.5 \times 10^4$ |
| - Installation (\$) **                                     | $1.5 \times 10^5$ | $5.5 \times 10^3$ | $7.2 \times 10^3$ |
| - Total capital cost (\$)                                  | $4.5 \times 10^5$ | $1.7 \times 10^4$ | $2.1 \times 10^4$ |
| <b>3. Annualized capital cost/throughput (\$/(kg/h))</b>   | $8.8 \times 10^3$ | $1.0 \times 10^3$ | $1.2 \times 10^3$ |
| -Power consumption (W) **                                  | 2500              | 0                 | 977               |
| <b>4. Annual Operating cost/throughput (\$/(kg/h)) ***</b> | $3.9 \times 10^5$ | $1.3 \times 10^5$ | $1.5 \times 10^5$ |

\* These values were measured based on the 100% of purity

\*\* based on the feed throughput (4.085 kg/h)

\*\*\* based on the annual operating time (7920h)

Selective hexane absorption from hexane/water mixture by surface- modified sponge filter (Movie 1) (MP4)

Selective solvent recovery from oil-in-hexane/water mixture by surface-modified sponge filter (Movie 2) (MP4)

Selective solvent recovery from lipid-in-hexane/medium with cell debris mixture by surface-modified sponge filter (Movie3) (MP4)

*In-situ* filtering method (Movie 4) (MP4)

*Ex-situ* filtering method (Movie 5) (MP4)
